# Supplementary material for: The ketogenic diet influences taxonomic and functional composition of the gut microbiota in children with severe epilepsy
Source: PubMed Central journal article supplement (PMC6344533; doi:10.1038/s41522-018-0073-2), 2019-01-23
Supplement: 41522_2018_73_MOESM1_ESM.pdf [file 41522_2018_73_MOESM1_ESM.pdf]

Supplementary Information:

The Supplementary Information contains two figures and two tables:

Supplementary Figure 1: Taxonomic analysis of a mock community

Supplementary Figure 2: Analysis of butyrate production potential

Supplementary Table 1:

Supplementary\_Table\_S1.xlsx - Metaphlan2 output table

Supplementary Table 2:

Supplementary\_Table\_S2.xlsx - SUPERFOCUS output table

# Supplementary Figures

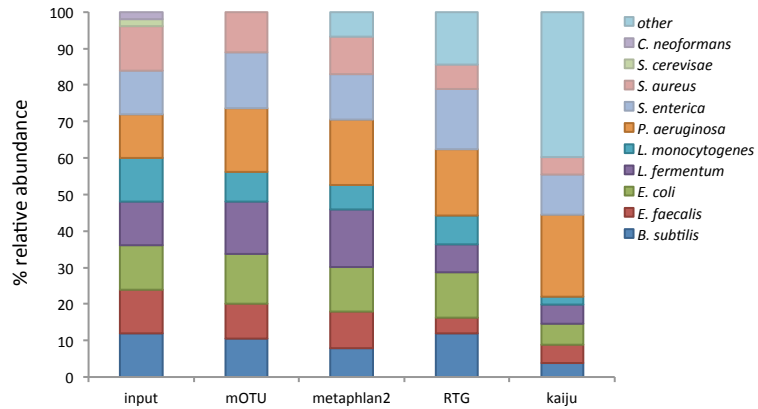

**Supplementary Figure 1. Taxonomic analysis of a mock community.** A defined microbial community ('input' on x-axis, ZymoResearch) was processed in parallel with fecal samples, thus DNA extraction, library preparation and sequencing was performed identically. The quality-filtered dataset was then used to benchmark our bioinformatics analysis pipeline testing mOTU, metaphlan2, RTG and kaiju. Relative abundance of the expected and other species is presented on the y-axis.

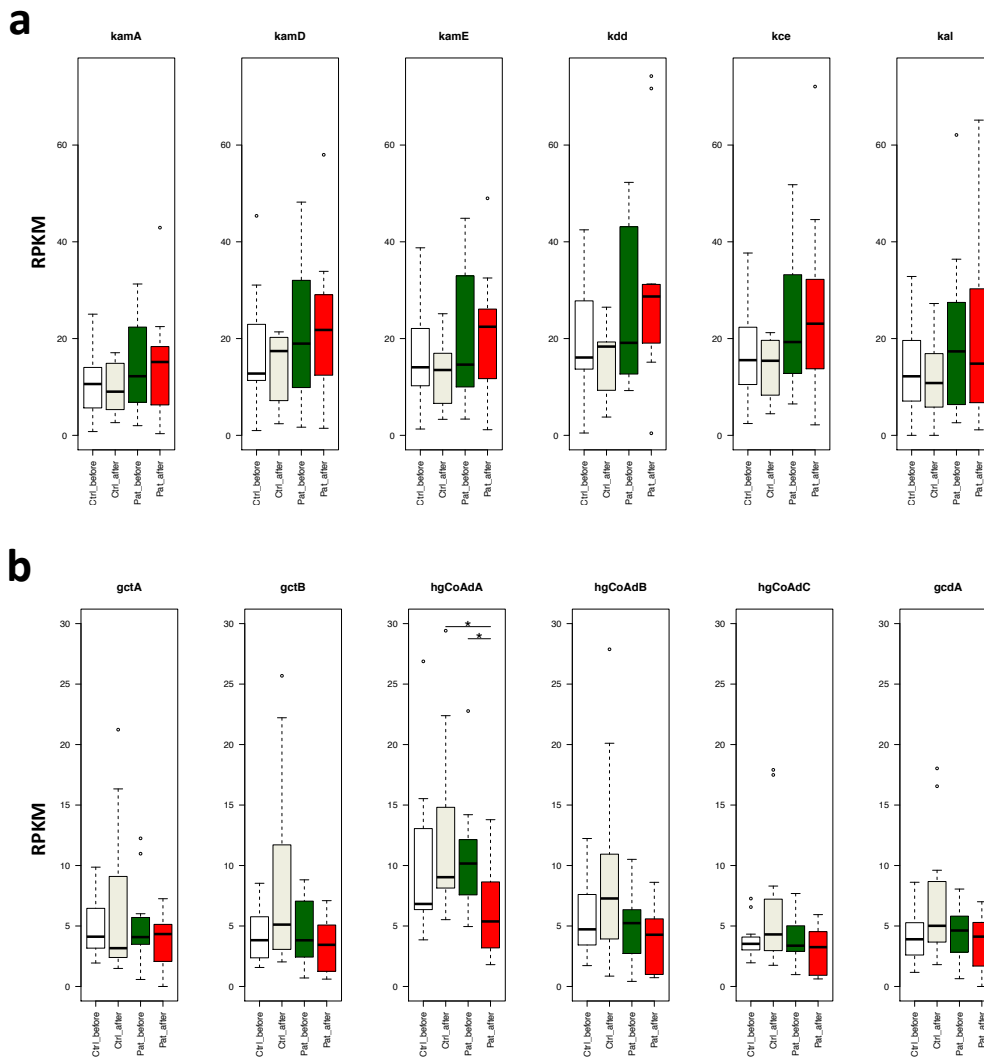

**Supplementary Figure 2. Analysis of butyrate production potential.** RPKM (reads per kilo base per million) values for unique genes of the lysine pathway (a) and the glutarate pathway (b) for butyrate production. Data are presented as follows: center line, median; box limits, upper and lower quartiles; whiskers, 1.5x interquartile range; points, outliers. Dunn's test of multiple comparisons with Benjamini-Hochberg adjustment: \*p < 0.05. Ctrl, control; Pat, patient. White, Controls time point 1; Ivory, Controls time point 2; Green, Patients time point 1; Red, Patients time point 2. *kamA*, lysine-2,3-aminomutase; *kamD*,  $\beta$ -lysine-5,6-aminomutase ( $\alpha$  subunit); *kamE*,  $\beta$ -lysine-5,6-aminomutase ( $\beta$  subunit); *kdd*, 3,5-diaminohexanoate dehydrogenase; *kce*, 3-keto-5-aminohexanoate cleavage enzyme; *kal*, 3-aminobutyryl-CoA ammonia-lyase; *gctA*, glutaconate-CoA transferase ( $\alpha$  subunit); *gctB*, glutaconate-CoA transferase ( $\beta$  subunit); *hgCoAd*, 2-hydroxyglutaryl-CoA dehydratase ( $\alpha$ ,  $\beta$ , and  $\gamma$  subunit); *gcdA*, glutaconyl-CoA decarboxylase ( $\alpha$  subunit).

## Supplementary Tables

Supplementary Table 1 and Supplementary Table 2 are provided separately.
